# Supplementary material for: Comprehensive detection of pathogens in immunocompromised children with bloodstream infections by next-generation sequencing
Source: PubMed Central journal article supplement (PMC5830625; doi:10.1038/s41598-018-22133-y), 2018-02-28
Supplement: 41598_2018_22133_MOESM1_ESM.pdf [file 41598_2018_22133_MOESM1_ESM.pdf]

## Supplementary Information

### **Comprehensive detection of pathogens in immunocompromised children with bloodstream infections by next-generation sequencing**

Kazuhiro Horiba<sup>1</sup>, Jun-ichi Kawada<sup>1</sup>, Yusuke Okuno<sup>1</sup>, Nobuyuki Tetsuka<sup>2</sup>,  
Takako Suzuki<sup>1</sup>, Shotaro Ando<sup>1</sup>, Yasuko Kamiya<sup>1</sup>, Yuka Torii<sup>1</sup>, Tetsuya Yagi<sup>2</sup>,  
Yoshiyuki Takahashi<sup>1</sup>, and Yoshinori Ito<sup>1\*</sup>

<sup>1</sup>Department of Pediatrics, Nagoya University Graduate School of Medicine, Nagoya,  
Japan

<sup>2</sup>Department of Infectious Disease, Nagoya University Hospital, Nagoya, Japan

**\*Corresponding author:** Yoshinori Ito, M.D., Ph.D.

Department of Pediatrics, Nagoya University Graduate School of Medicine

65 Tsurumai-cho, Showa-ku, Nagoya 466-8550, Japan

Tel: +81-52-744-2294; Fax: +81-52-744-2974

E-mail: [yoshi-i@med.nagoya-u.ac.jp](mailto:yoshi-i@med.nagoya-u.ac.jp)

**Supplementary Table 1: Characteristics of febrile patients with positive blood cultures**

| Patient | Age | Sex | Symptoms at onset | WBC (/ $\mu$ l) | CRP (mg/dl) | Isolated bacteria by blood culture  | Isolated bacteria by catheter culture | Underlying disease      |
|---------|-----|-----|-------------------|-----------------|-------------|-------------------------------------|---------------------------------------|-------------------------|
| B1      | 2m  | M   | fever             | 8,500           | 8.51        | <i>Escherichia coli</i>             | not examined                          | neuroblastoma           |
| B2      | 1y  | F   | elevated CRP      | 500             | 1.61        | <i>Capnocytophaga sputigena</i>     | not examined                          | acute lymphoid leukemia |
| B3      | 2y  | F   | fever             | <100            | 1.80        | <i>Streptococcus oralis/mitis</i>   | not examined                          | neuroblastoma           |
| B4      | 6y  | M   | fever             | 4,500           | 0.16        | <i>Stenotrophomonas maltophilia</i> | <i>Stenotrophomonas maltophilia</i>   | acute lymphoid leukemia |
| B5      | 6y  | M   | fever             | <100            | 9.69        | <i>Staphylococcus aureus</i>        | not examined                          | neuroblastoma           |
| B6      | 8y  | F   | fever, dyspnea    | 66,000          | 1.80        | <i>Acinetobacter ursingii</i>       | not examined                          | acute lymphoid leukemia |
| B7      | 8y  | M   | fever, chills     | 5,000           | 0.80        | <i>Stenotrophomonas maltophilia</i> | <i>Stenotrophomonas maltophilia</i>   | neuroblastoma           |
| B8      | 8y  | M   | fever             | <100            | 0.27        | <i>Streptococcus oralis/mitis</i>   | negative                              | acute lymphoid leukemia |
| B9      | 9y  | F   | elevated CRP      | 9,100           | 3.88        | <i>Bacillus cereus</i>              | <i>Bacillus cereus</i>                | nasal cavity cancer     |
| B10     | 10y | M   | fever             | 7,800           | 0.72        | <i>Sphingomonas paucimobilis</i>    | <i>Sphingomonas paucimobilis</i>      | neuroblastoma           |
| B11     | 10y | M   | fever, chills     | <100            | 3.88        | <i>Staphylococcus lugdunensis</i>   | not examined                          | neuroblastoma           |
| B12     | 10y | F   | fever             | 10,700          | 15.76       | <i>Staphylococcus epidermidis</i>   | <i>Staphylococcus epidermidis</i>     | neuroblastoma           |

WBC, white blood cell count; CRP, C-reactive protein.

**Supplementary Table 2: Characteristics of febrile patients with negative blood cultures**

| Patient | Age | Sex | Symptoms at onset | WBC (/ $\mu$ l) | CRP (mg/dl) | Underling disease                |
|---------|-----|-----|-------------------|-----------------|-------------|----------------------------------|
| N1      | 2y  | M   | fever             | 1,300           | 13.46       | langerhans histiocytosis         |
| N2      | 2y  | M   | fever             | 14,200          | 5.55        | langerhans histiocytosis         |
| N3      | 2y  | M   | fever             | 15,100          | 15.72       | after liver transplantation      |
| N4      | 2y  | F   | fever             | 1,900           | 26.23       | acute myeloid leukemia           |
| N5      | 2y  | M   | fever             | 11,200          | 2.40        | juvenile myelomonocytic leukemia |
| N6      | 2y  | M   | fever             | <100            | 2.16        | yolk sac tumor                   |
| N7      | 3y  | F   | fever             | <100            | 0.90        | neuroblastoma                    |
| N8      | 3y  | F   | fever             | 5,100           | 15.0        | sepsis                           |
| N9      | 3y  | F   | fever             | <100            | 1.82        | neuroblastoma                    |
| N10     | 4y  | F   | fever             | <100            | 8.73        | acute lymphoid leukemia          |
| N11     | 4y  | M   | fever             | <100            | 6.94        | neuroblastoma                    |
| N12     | 6y  | M   | fever, chills     | 5,500           | 0.16        | neuroblastoma                    |
| N13     | 7y  | F   | fever             | <100            | 0.16        | neuroblastoma                    |
| N14     | 7y  | F   | fever, chills     | 2,400           | 3.12        | acute lymphoid leukemia          |
| N15     | 8y  | F   | fever, chills     | 3,500           | 8.19        | neuroblastoma                    |
| N16     | 9y  | F   | fever             | 14,400          | 14.4        | sepsis                           |
| N17     | 10y | M   | fever, chills     | 7,600           | 0.06        | neuroblastoma                    |
| N18     | 10y | M   | fever             | 300             | 0.40        | acute lymphoid leukemia          |
| N19     | 11y | M   | fever             | 7,300           | 1.68        | aplastic anemia                  |
| N20     | 13y | F   | fever, convulsion | 3,700           | 6.82        | chronic myelomonocytic leukemia  |
| N21     | 14y | F   | fever             | <100            | 5.23        | Wilms' tumor                     |
| N22     | 16y | F   | fever             | 600             | 17.72       | aplastic anemia                  |
| N23     | 17y | M   | fever             | 1,100           | 0.31        | acute myeloid leukemia           |

WBC, white blood cell count; CRP, C-reactive protein.

**Supplementary Table 3: Detection of antimicrobial resistance genes in patients diagnosed by next-generation sequencing**

| Patient | Detected bacteria by NGS<br>(taxonomic rank)  | Detected antimicrobial resistance gene* | Drug susceptibility<br>of cultured bacteria                           | Drug resistance<br>of cultured bacteria                               |
|---------|-----------------------------------------------|-----------------------------------------|-----------------------------------------------------------------------|-----------------------------------------------------------------------|
| B1      | <i>Escherichia coli</i> (species)             | strB, dfrA17, aadA5, mph(A), strA       | CVA/AMPC, TAZ/PIPC, CMZ, SBT/CPZ, IPM, MEPM, GM, TOB, AMK, MINO, DRPM | ABPC, PIPC, CEZ, CCL, CTX, CTRX, CPDX, CAZ, CFPM, AZT, CPFX, LVFX, ST |
| B2      | <i>Comamonadaceae</i> (family)                | no genes found                          | -                                                                     | -                                                                     |
| B3      | <i>Streptococcus</i> (genus)                  | mef(A), msr(D)                          | CTX, CTRX, MEPM, CLDM, LVFX, VCM, CP                                  | EM                                                                    |
| B4      | <i>Stenotrophomonas maltophilia</i> (species) | blaL1, aac(6)-Iz, sph                   | CAZ, MINO, LVFX, ST                                                   | No resistance                                                         |
| B7      | <i>Stenotrophomonas maltophilia</i> (species) | blaL1, sph                              | MINO, LVFX, ST                                                        | CFPM, CZOP                                                            |
| B9      | <i>Bacillus</i> (genus)                       | no genes found                          | CTRX, IPM, GM, AMK, EM, CLDM, TC, CPFX, VCM, RFP                      | PCG, ABPC, ST                                                         |
| B10     | <i>Sphingomonadaceae</i> (family)             | no genes found                          | TAZ/PIPC, CAZ, SBT/CPZ, IPM, MEPM, GM, TOB, AMK, MINO, LVFX, ST       | PIPC, AZT                                                             |
| B12     | <i>Staphylococcus epidermidis</i> (species)   | mph(C), blaZ, mecA, dfrG, fosA, msr(A)  | GM, CLDM, MINO, LVFX, VCM, TEIC, LZD, FOM, RFP                        | PCG, ABPC, MIPIC, CEZ, CTM, FMOX, IPM, EM, ST                         |
| N1      | <i>Tatlockia micdadei</i> (species)           | aph(3)-IIa, blaTEM-116, blaTEM-157      | -                                                                     | -                                                                     |
| N19     | <i>Escherichia coli</i> (species)             | no genes found                          | -                                                                     | -                                                                     |

\*, Detected antimicrobial resistance gene was shown, if the fraction of reference covered accounted for more than 50%; ABPC, Ampicillin; AMK, Amikacin; AZT, Aztreonam; CAZ, Ceftazidime; CCL, Cefaclor; CFPM, Cefepime; CEZ, Cefazolin; CLDM, Clindamycin; CPFX, Ciprofloxacin; CPDX, Cefpodoxime; CTX, Cefotaxime; CTRX, Ceftriaxone; CTM, Cefotiam; CVA/AMPC, Clavulanate/Amoxicillin; CZOP, Cefozopran; DRPM, Doripenem; EM, Erythromycin; FMOX, Flomoxef; FOM, Fosfomycin; GM, Gentamicin; IPM, Imipenem; LVFX, Levofloxacin; LZD, Linezolid; MEPM, Meropenem; MIPIC, Methylphenylisoxazolympenicillin; PCG, Benzylpenicillin; PIPC, Piperacillin; RFP, Rifampicin; ST, Sulfamethoxazole -Trimethoprim; TAZ/PIPC, Tazobactam/Piperacillin; TEIC, Teicoplanin; TOB, Tobramycin; VCM, Vancomycin.

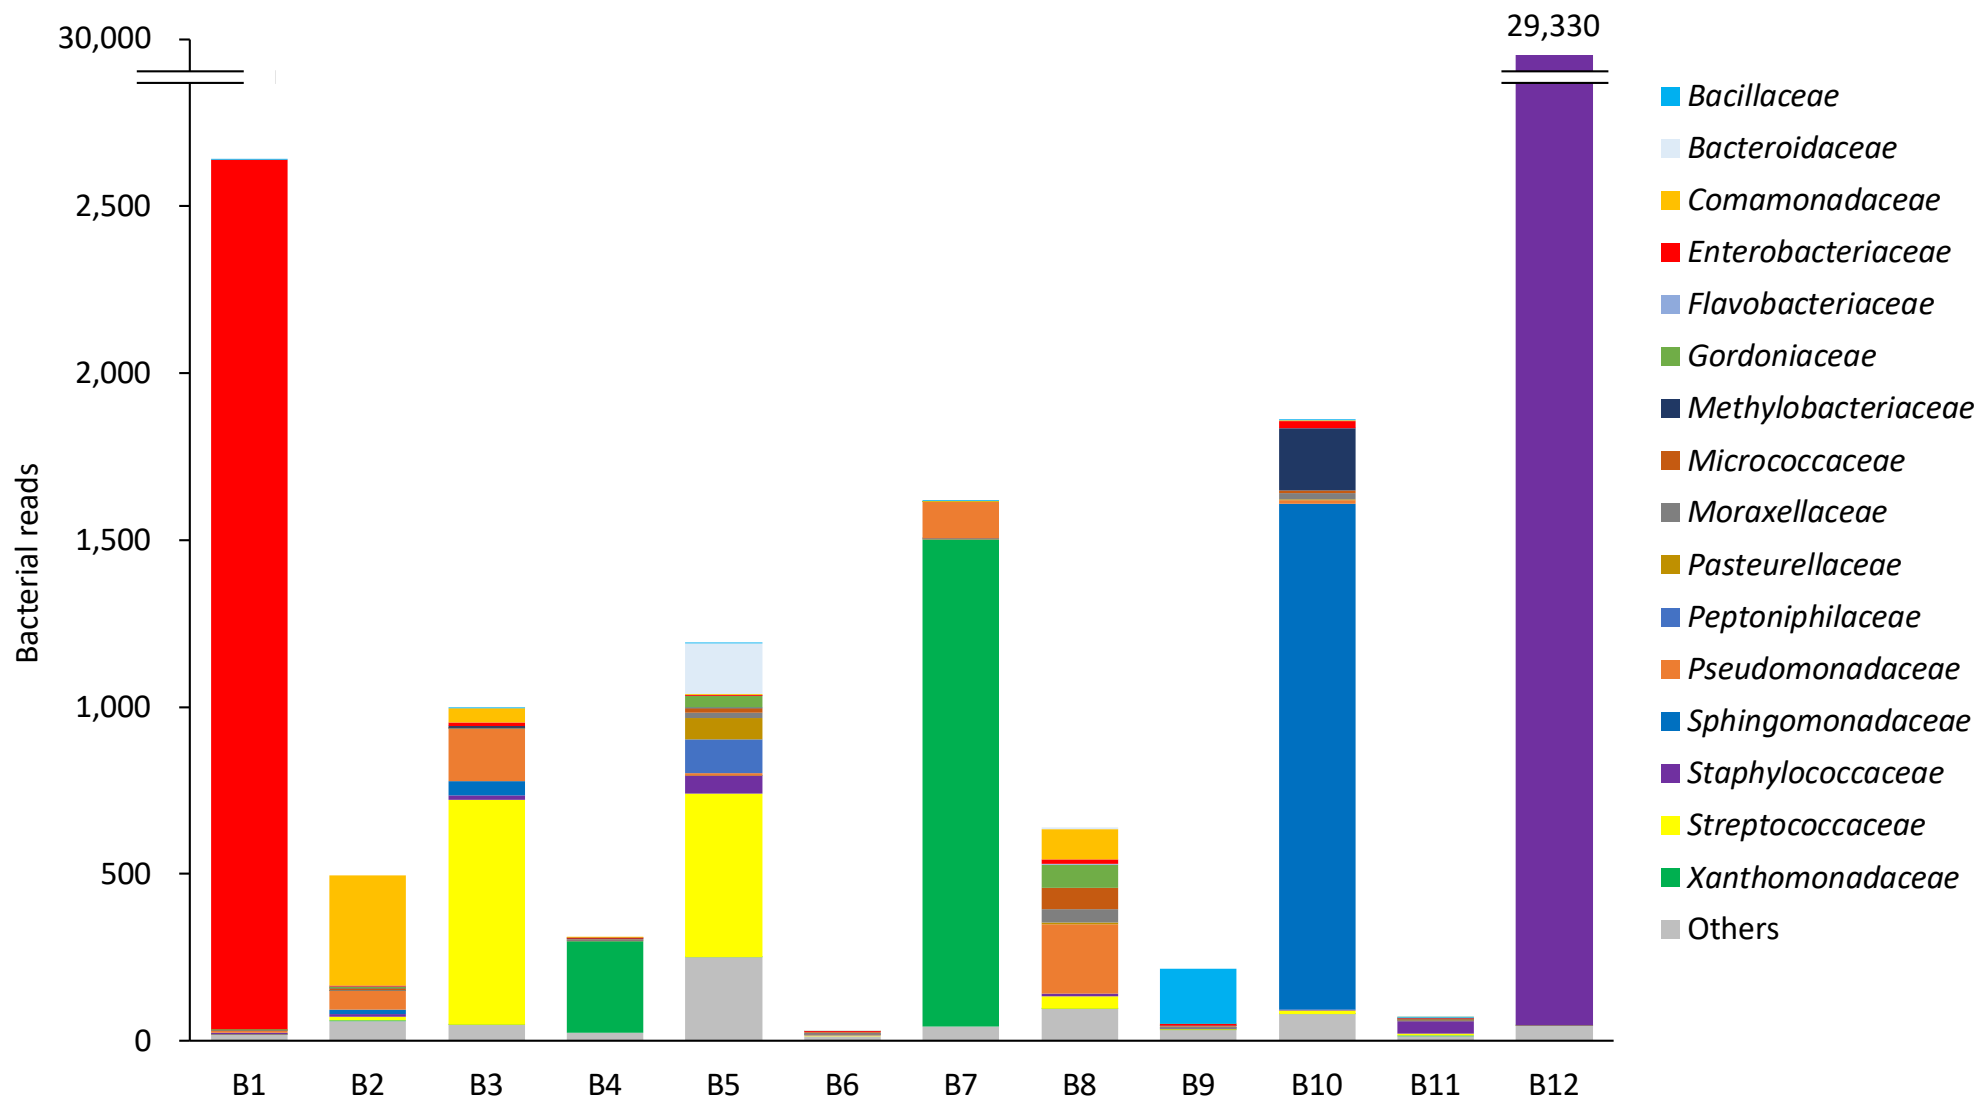

Supplemental Figure 1

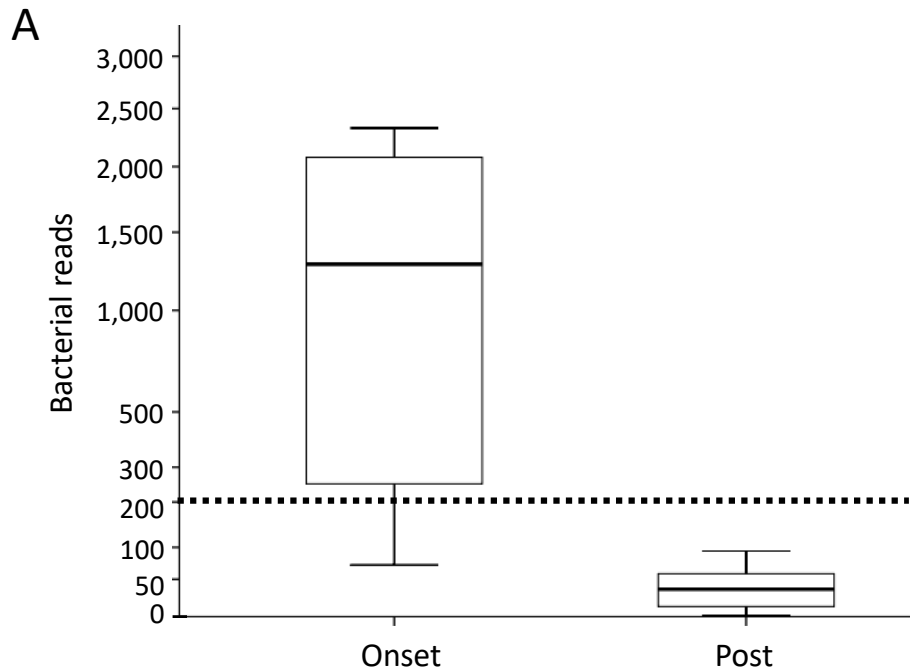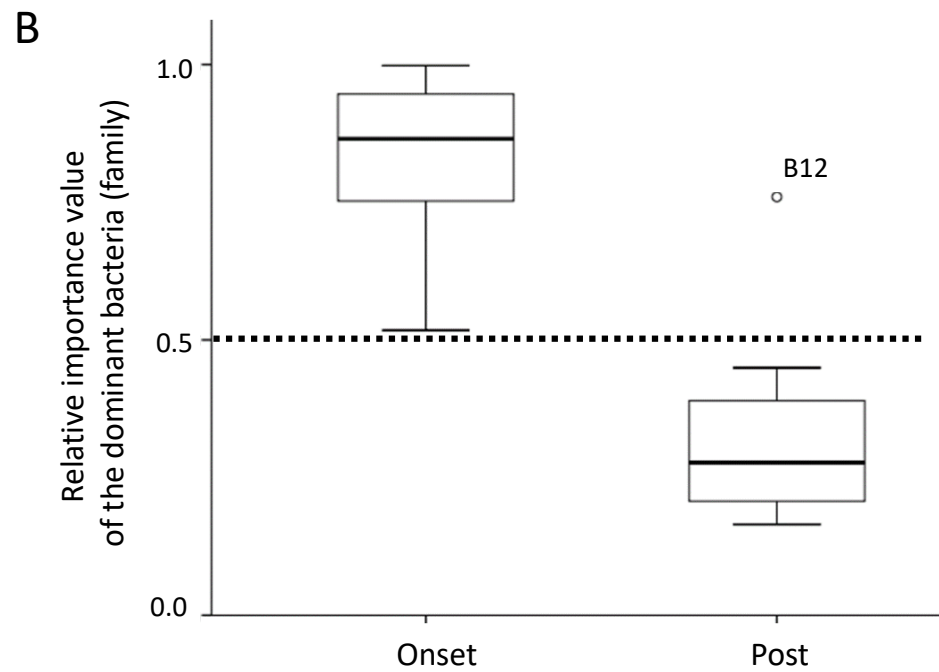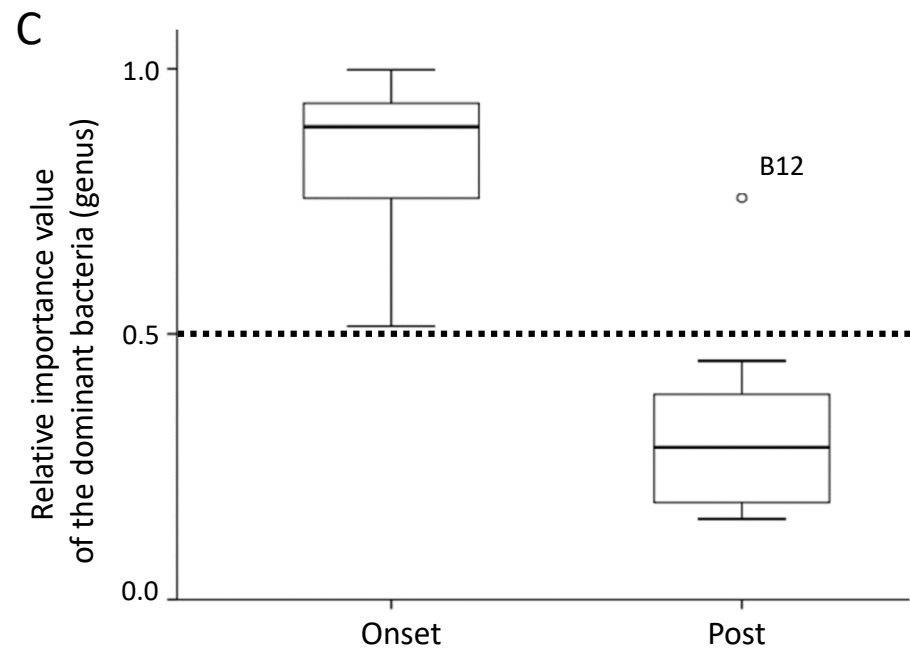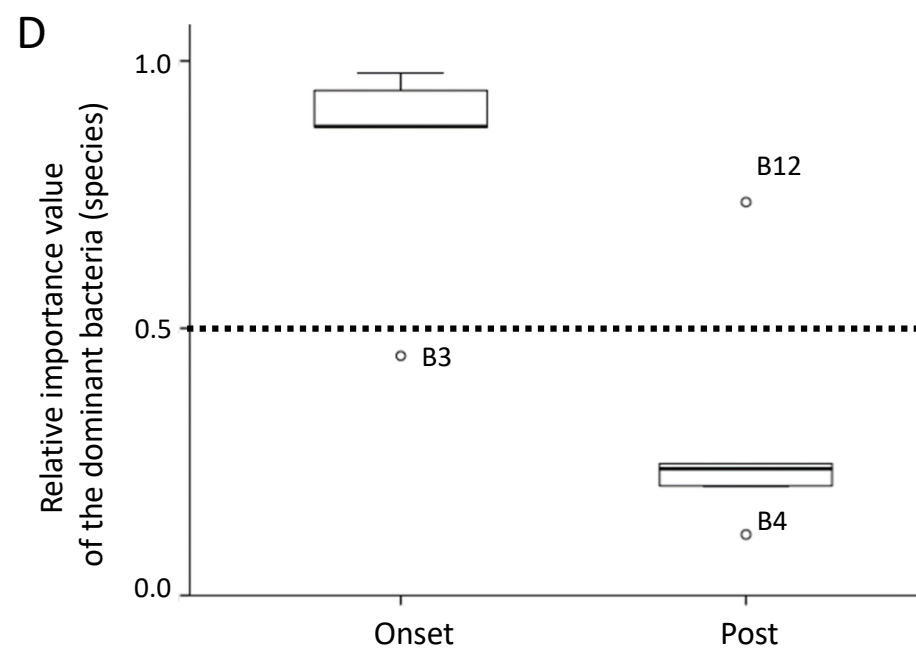

Supplemental Figure 2

B1 *Escherichia coli* [str. K-12 substr. MG1655 (NC\_000913)]

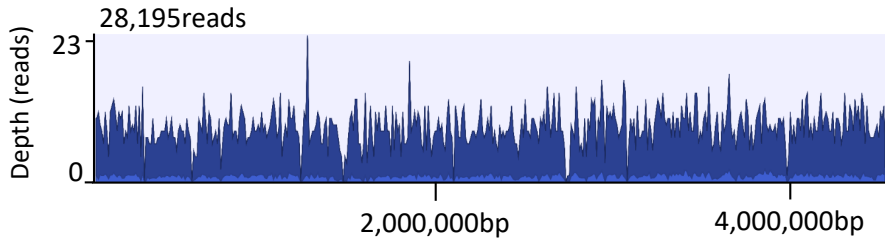

B3 *Streptococcus mitis* [B6 (NC\_013853)]

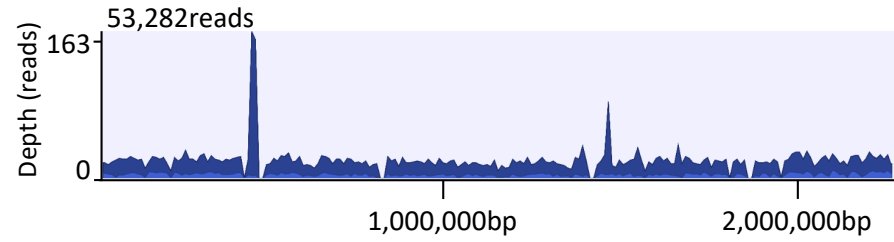

B4 *Stenotrophomonas maltophilia* [K279a (NC\_10943)]

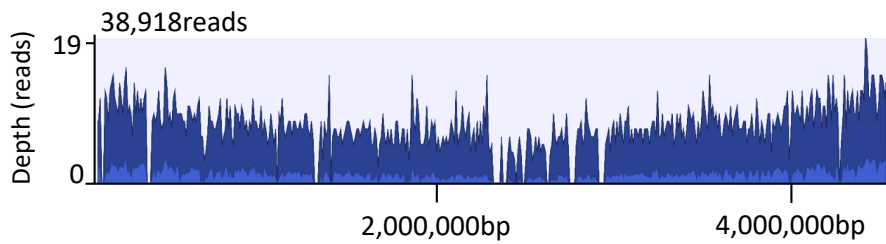

B7 *Stenotrophomonas maltophilia* [K279a (NC\_10943)]

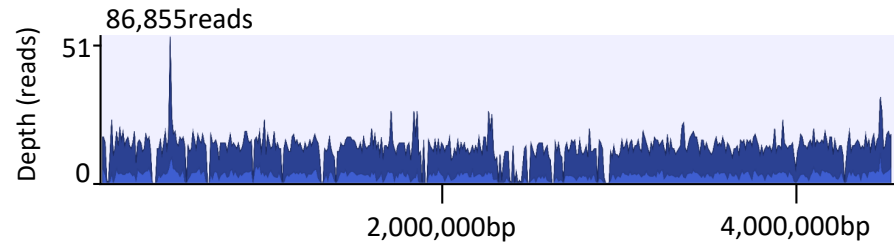

B9 *Bacillus cereus* [ATCC 14579 (NC\_004722)]

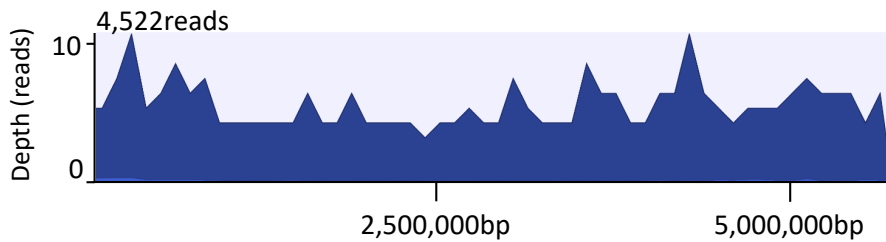

B10 *Sphingomonas paucimobilis* [NBRC 13935 (NZ\_BBJS01000061)]

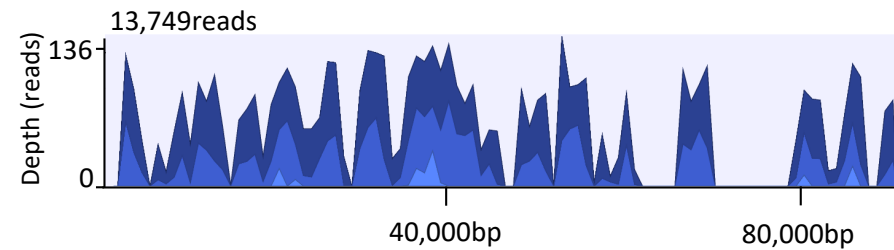

B12 *Staphylococcus epidermidis* [ATCC (NC\_00461)]

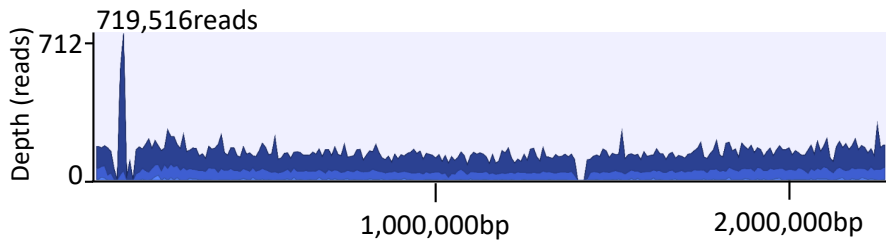

**A** N1 *Tatlockia micdadei* [genome assembly LMI, chromosome : I (NZ\_LN614830)]

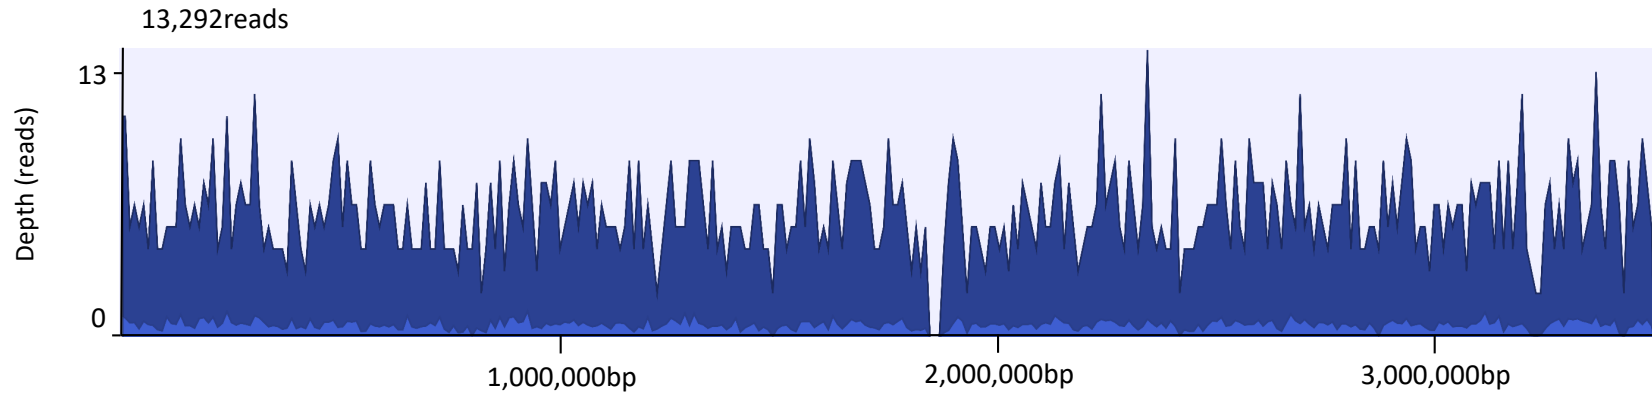

**B** N19 *Escherichia coli* [str. K-12 substr. MG1655 (NC\_000913)]

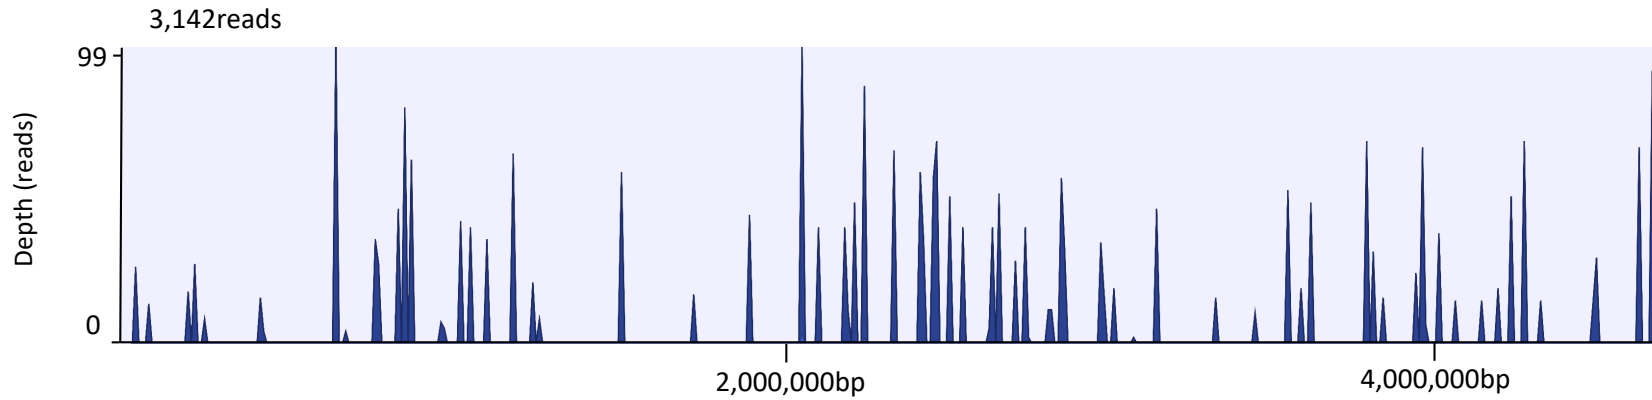

**C** N22 *Human adenovirus 2* [complete genome (AC\_000007)]

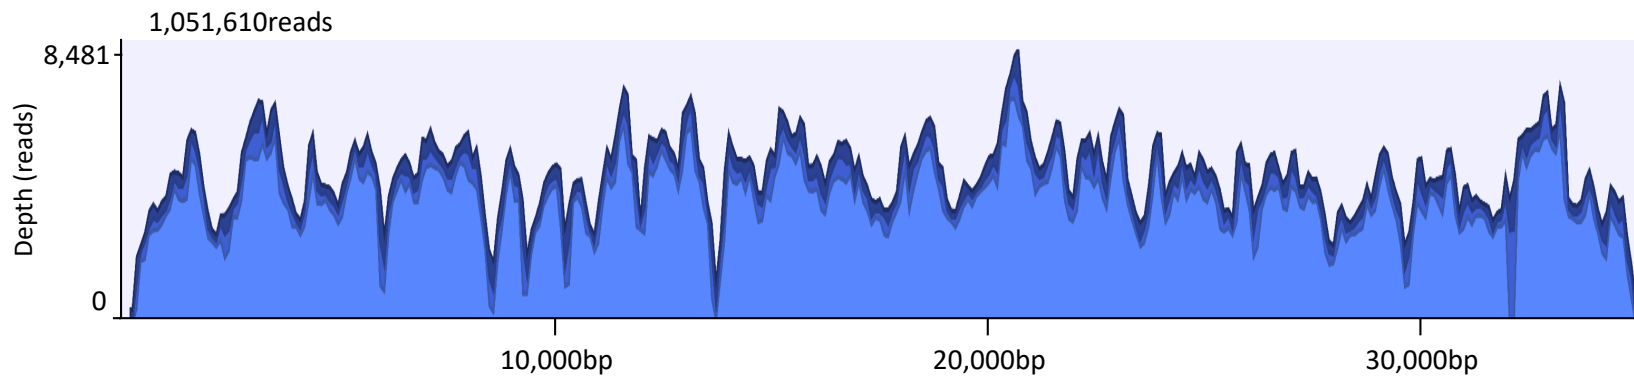



A *Legionella spp.*

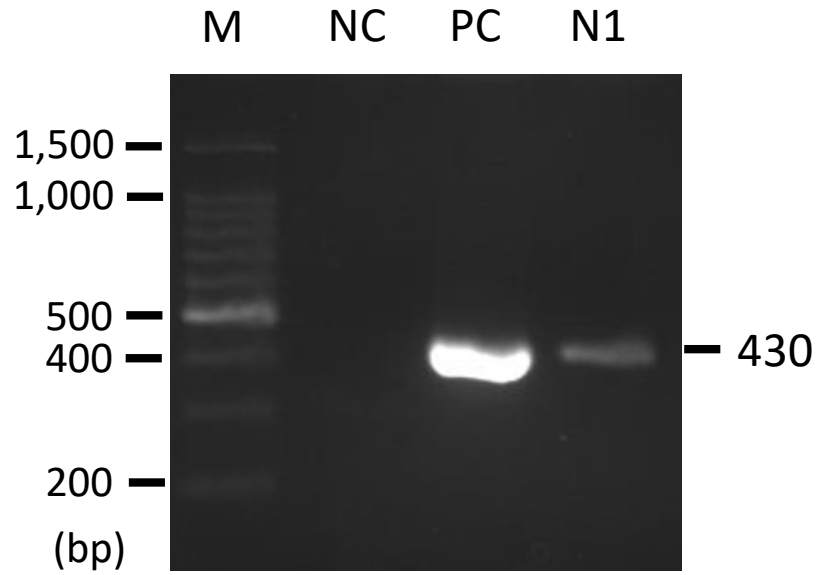

B *Adenovirus*

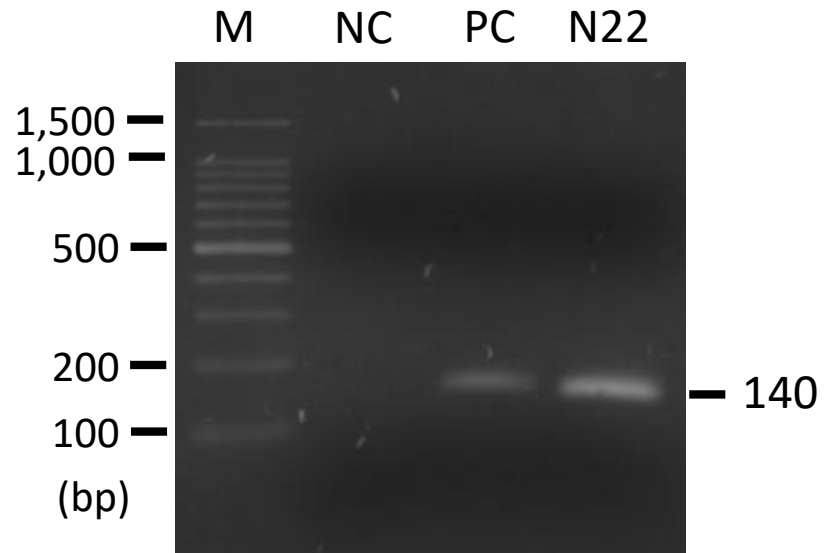

Supplemental Figure 5

**Supplementary Figure 1: Bacterial reads per million reads of sequencing in patients with bloodstream infection**

Each bar represents taxa at the family level of taxonomic hierarchy. Bacterial reads of patient B12 were more than 10-fold higher than those of the other patients.

**Supplementary Figure 2: Bacterial reads per million reads of sequencing and index values in bloodstream infection patients in whom the dominant bacteria by next-generation sequencing was identical to bacteria isolated in blood culture**

(A) Bacterial reads per million reads of sequencing (BR) are demonstrated at onset and post-onset of the infection. (B) Relative importance value of the dominant bacteria (P1) at the family level in 8 patients (B1, B3, B4, B7, B9, B10, B11, and B12) is shown at the two time points. (C) P1 at the genus level in 7 patients (B1, B3, B4, B7, B9, B11, and B12) is shown at the two time points. (D) P1 at the species level in 5 patients (B1, B3, B4, B7, and B12) is shown at the two time points.

**Supplementary Figure 3: Coverage of reference genomes of the dominant bacteria by next-generation sequencing in patients with bloodstream infection**

Sequencing reads were mapped to the reference genomes of the dominant bacteria, which were identical to bacteria isolated in blood culture, in seven patients. Light blue, blue, and dark blue colors in the alignments represent minimal, average, and maximal coverage in aggregated 100-bp regions, respectively.

**Supplementary Figure 4: Coverage of reference genomes of causative microorganisms by next-generation sequencing in patients with suspected bloodstream infection**

Sequencing reads were mapped to the reference genomes of causative microorganisms in patients N1, N19, and N22. Light blue, blue, and dark blue colors in the alignments represent minimal, average, and maximal coverage in aggregated 100-bp regions in patients N1 and N19 and 10-bp region in patient N22.

**Supplementary Figure 5: Amplification of microbial DNA from clinical samples**

*Legionella* spp. and adenovirus were PCR amplified from blood samples from patients N1 and N22, respectively. The expected product size of each PCR is shown. M=100-bp DNA ladder marker, NC=negative control, PC=positive control.
